# Supplementary material
Source: Springer Nature journal article supplement (https://www.springermedizin.de/resource/supplementary/12992_2010_110_MOESM1_ESM.pdf/9616474)
Supplement: MOESM1 [file 9616474]

# Medical tourism and policy implications for health systems

## Governance

- > Separate governance and policymaking at international, regional and national levels

## Regulation

- > Public and private sector quality control
- > Joint Commission International accreditation
- > Medical tourist brokers

## Delivery

- > Private sector growth
- > Foreign direct investment in health infrastructure

## Human resources

- > Specialists' distribution between public and private sectors
- > Future human resource capacity

## Financing

- > Out of pocket payments
- > Organized medical tourist insurance (e.g. Employer linked)
